# Supplementary material for: The reaction pathways of 5-hydroxymethylfurfural conversion in a continuous flow reactor using copper catalysts
Source: Royal Society of Chemistry journal article supplement (doi:10.1039/d1cy02197d), 2022-01-01
Supplement: d1cy02197d1.pdf [file d1cy02197d1.pdf]

## Supporting information

### The reaction pathways of 5-hydroxymethylfurfural conversion in a continuous flow reactor using copper catalysts

**Bao Chen<sup>1</sup>, Xin Li<sup>1</sup>, Peng Rui<sup>1</sup>, Yuewen Ye<sup>1</sup>, Tongqi Ye<sup>1\*</sup>, Rulong Zhou<sup>2</sup>, Dongdong Li<sup>2</sup>,  
James H. Carter<sup>3\*</sup>, Graham J. Hutchings<sup>3</sup>**

*1. School of Chemistry and Chemical Engineering, Hefei University of Technology, Hefei, Anhui, 230009, P.R. China;*

*2. School of Materials Science and Engineering, Hefei University of Technology, Hefei, Anhui, 230009, P.R. China;*

*3. Max Planck- Cardiff Centre on the Fundamentals of Heterogeneous Catalysis FUNCAT, Cardiff Catalysis Institute, School of Chemistry, Cardiff University, Main Building, Park Place, Cardiff, CF10 3AT, UK*

*\* Correspondence: E-mail: [yetq@hfut.edu.cn](mailto:yetq@hfut.edu.cn)*

*\* Correspondence: E-mail: [carterj5@cf.ac.uk](mailto:carterj5@cf.ac.uk)*

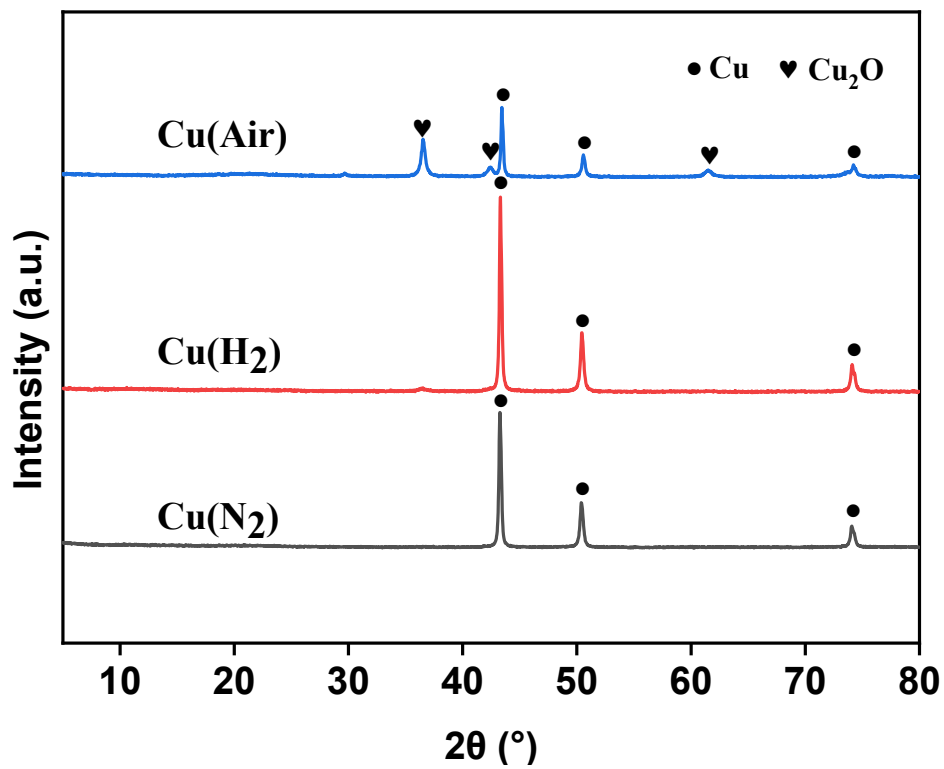

Fig. S1. Post-reaction XRD of bulk CuO catalysts after reaction in various atmospheres.

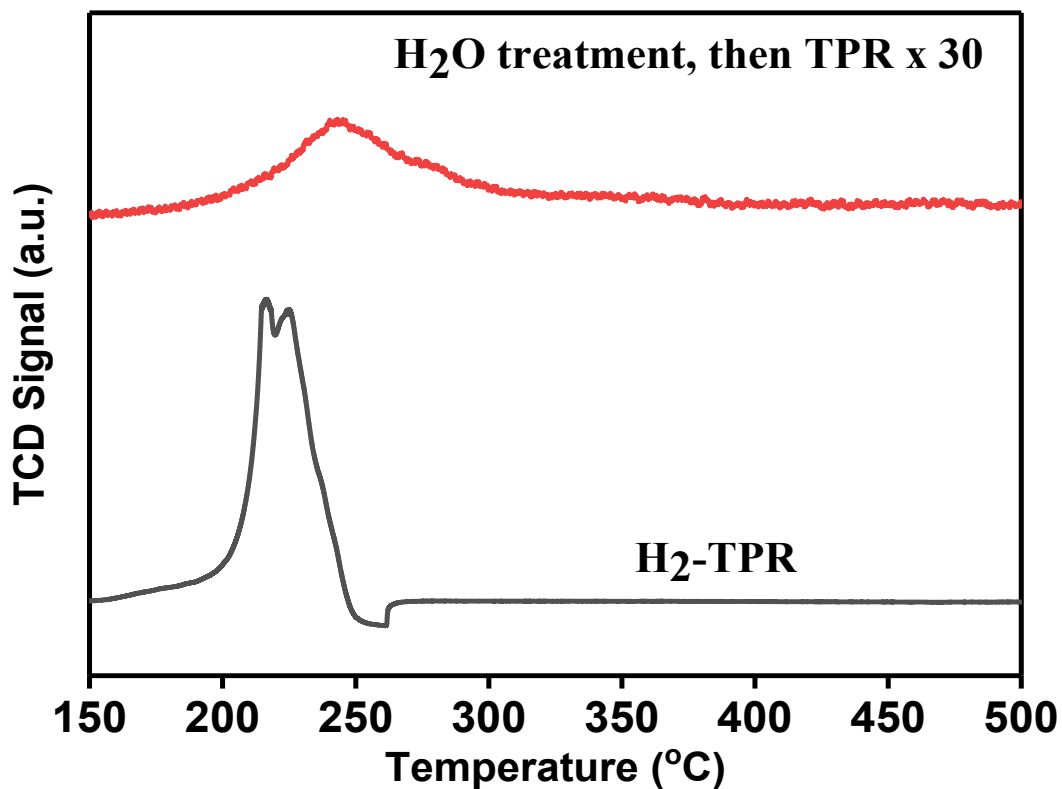

Fig. S2. H<sub>2</sub>-TPR of bulk CuO reduced and then exposed to H<sub>2</sub>O/He at 260 °C.

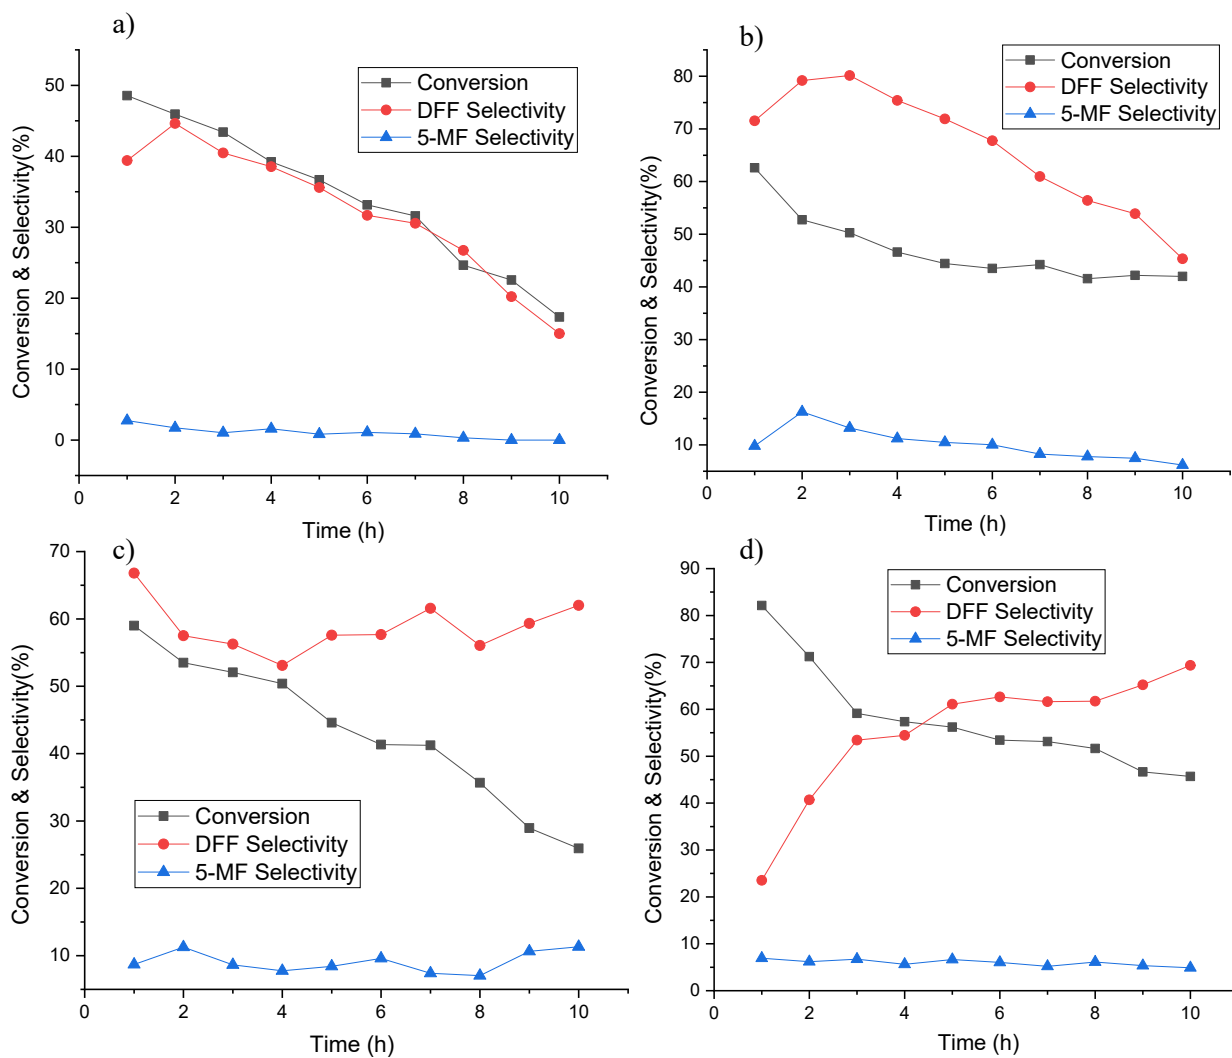

Fig. S3. Time on-stream data for a) Bulk CuO, b) Cu/Al<sub>2</sub>O<sub>3</sub>, c) Cu/SiO<sub>2</sub> and d) CuZnOAlO<sub>x</sub>.

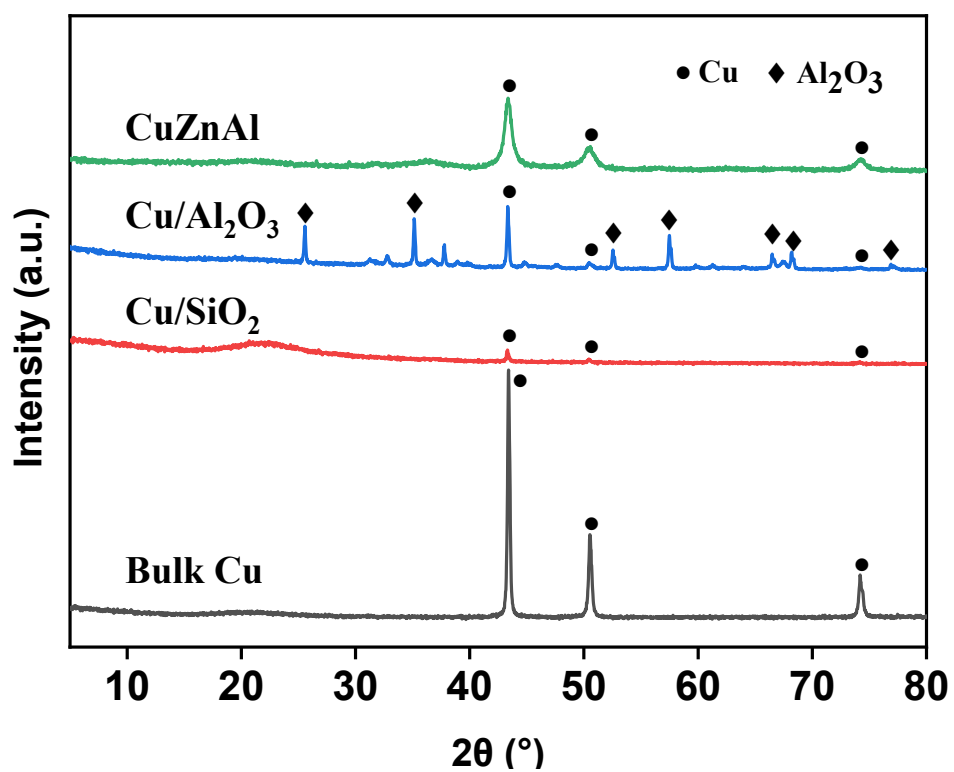

Fig. S4. Post-reaction X-ray diffraction patterns of catalysts tested for 10 h on-stream.

Table S1. Summary of catalysts reported for 5-HMF to DFF.

| Catalyst                                                               | Catalyst (mg) | HMF conc. (mmol) | T (°C) | t (h) | Gas                      | Solvent                 | Conv. (%) | DFF Sel. (%) | DFF Yield (%) | STY (mmol·g <sup>-1</sup> ·h <sup>-1</sup> ) | Ref.      |
|------------------------------------------------------------------------|---------------|------------------|--------|-------|--------------------------|-------------------------|-----------|--------------|---------------|----------------------------------------------|-----------|
| KMn <sub>8</sub> O <sub>16</sub> ·nH <sub>2</sub> O                    | 50            | 1                | 110    | 1     | O <sub>2</sub> 5bar      | DMF                     | 100       | 97           | 97            | 19.4                                         | 1         |
| 5%Mn/CoOx                                                              | 50            | 0.5              | 130    | 4     | air 1bar                 | DMF                     | 80        | 95           | 76            | 1.9                                          | 2         |
| VOx                                                                    | 100           | 1                | 130    | 1     | O <sub>2</sub> 30bar     | H <sub>2</sub> O        | 93.7      | 100          | 94            | 9.4                                          | 3         |
| Ni <sub>3</sub> Mn-LDH                                                 | 200           | 1                | 100    | 4     | O <sub>2</sub> 10 mL/min | DMSO, 3ml               | 82.3      | 91           | 75            | 0.9                                          | 4         |
| Ru/OMC-P <sub>0.56</sub>                                               | 80            | 2                | 90     | 4     | O <sub>2</sub> 20bar     | Toluene, 25 ml          | 100       | 88           | 88            | 5.5                                          | 5         |
| Mn <sub>0.7</sub> O <sub>2</sub> Cu <sub>0.05</sub> Al <sub>0.25</sub> | 50            | 1                | 90     | 24    | O <sub>2</sub> 8bar      | H <sub>2</sub> O, 10ml  | 90        | 87           | 78            | 0.7                                          | 6         |
| Ru@mPMF                                                                | 50            | 2                | 105    | 12    | O <sub>2</sub> 20bar     | Toluene, 10 ml          | 99.6      | 85           | 85            | 2.8                                          | 7         |
| Cu/MnO <sub>2</sub>                                                    | 50            | 2                | 140    | 5     | O <sub>2</sub> , 3 bar   | Methanol, 15 ml         | 75        | 51           | 38            | 3.1                                          | 8         |
| Cu                                                                     | 200           | 1                | 260    | 0.75  | N <sub>2</sub> 10 mL/min | H <sub>2</sub> O, 10 ml | 42        | 90           | 38            | 2.5                                          | This work |
| Cu/SiO <sub>2</sub>                                                    | 200           | 1                | 260    | 0.75  | N <sub>2</sub> 10 mL/min | H <sub>2</sub> O, 10 ml | 53        | 53           | 28            | 1.8                                          | This work |
| Cu/Al <sub>2</sub> O <sub>3</sub>                                      | 200           | 1                | 260    | 0.75  | N <sub>2</sub> 10 mL/min | H <sub>2</sub> O, 10 ml | 48        | 79           | 38            | 2.5                                          | This work |
| CuZnAl                                                                 | 200           | 1                | 260    | 0.75  | N <sub>2</sub> 10 mL/min | H <sub>2</sub> O, 10 ml | 68        | 48           | 33            | 2.2                                          | This work |

## References

- 1 J. Nie and H. Liu, *J. Catal.*, 2014, **316**, 57–66.
- 2 S. Biswas, B. Dutta, A. Mannodi-Kanakkithodi, R. Clarke, W. Song, R. Ramprasad and S. L. Suib, *Chem. Commun.*, 2017, **53**, 11751–11754.
- 3 Y. Yan, K. Li, J. Zhao, W. Cai, Y. Yang and J. M. Lee, *Appl. Catal. B Environ.*, 2017, **207**, 358–365.
- 4 W. Zhou, Z. Kong, Z. Wu, S. Yang, Y. Wang and Y. Liu, *Catal. Commun.*, 2021, **151**, 106279.
- 5 H.-F. Ren, · Xiao Luo, · Ke Zhang, Q. Cai, C.-L. Liu and W.-S. Dong, *J. Porous Mater.*, 2020, **27**, 1003–1012.
- 6 F. Neațu, N. Petrea, R. Petre, V. Somoghi, M. Florea and V. I. Parvulescu, *Catal. Today*, 2016, **278**, 66–73.
- 7 K. Ghosh, R. A. Molla, M. A. Iqbal, S. S. Islam and S. M. Islam, *Appl. Catal. A Gen.*, 2016, **520**, 44–52.
- 8 X. Tong, Y. Sun, X. Bai and Y. Li, *RSC Adv.*, 2014, **4**, 44307–44311.
